# Supplementary material for: Toroidal diamond anvil cell for detailed measurements under extreme static pressures
Source: PubMed Central journal article supplement (PMC6060175; doi:10.1038/s41467-018-05294-2), 2018-07-25
Supplement: 41467_2018_5294_MOESM1_ESM.pdf [file 41467_2018_5294_MOESM1_ESM.pdf]

# SUPPLEMENTARY INFORMATION

**Toroidal diamond anvil cell for detailed measurements under extreme static pressures**

Agnès Dewaele *et al.*

## **Contents:**

Supplementary Figures 1-7

Supplementary Tables 1-7

Supplementary Notes 1-3

Supplementary References

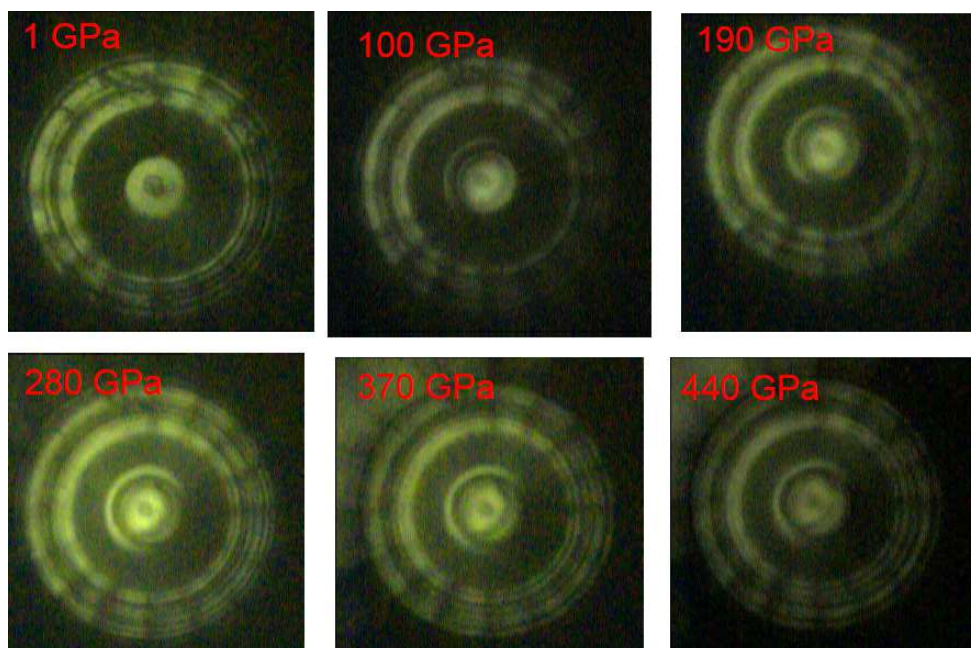

SUPPLEMENTARY FIGURE 1. **Photographs of the sample chamber taken during run 2.** The gold sample (in KCl) is illuminated in reflection.

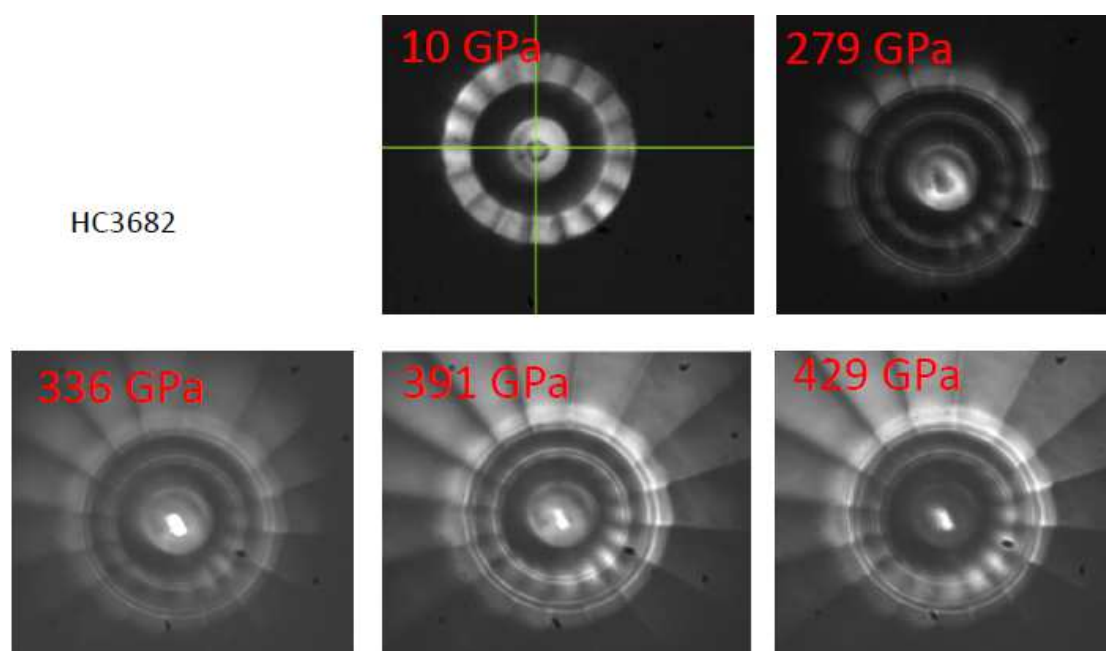

SUPPLEMENTARY FIGURE 2. **Photographs of the sample chamber taken during run 5.** The argon sample is illuminated in reflection and transmission.

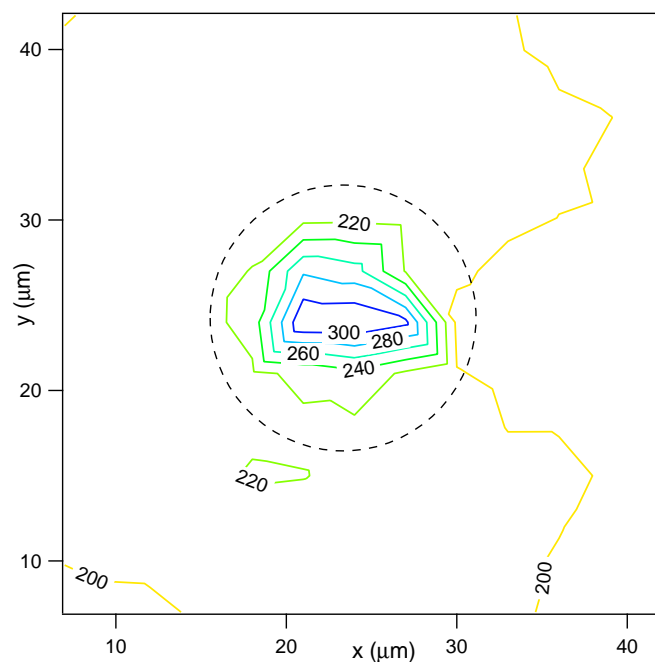

SUPPLEMENTARY FIGURE 3. **Distribution of pressure at the maximum pressure reached in a trial run.** The toroidal pit depth was  $5\ \mu\text{m}$ . The pressure reached only 309 GPa in this run. It is estimated using rhenium gasket XRD signal and equation of state [1]. The dashed circle corresponds to the limit of the diamond's central flat. The pressure gradients are high on the central flat ( $30\ \text{GPa}/\mu\text{m}$ ).

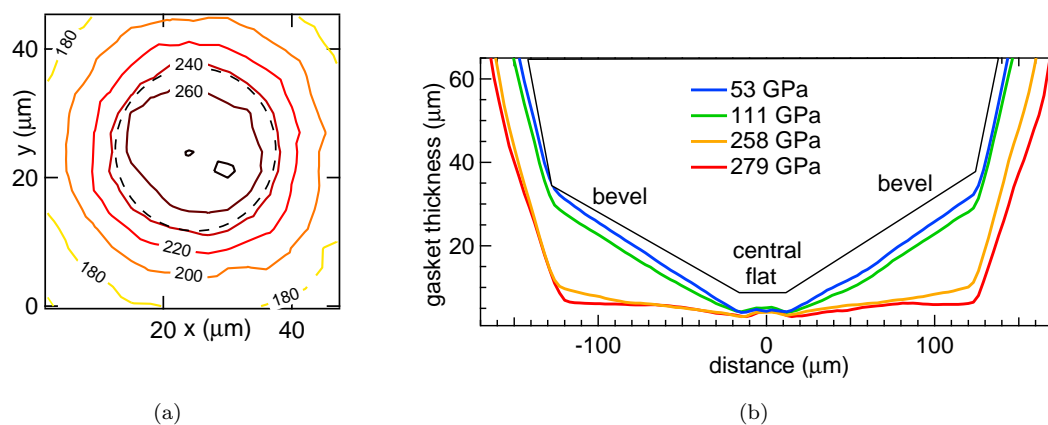

SUPPLEMENTARY FIGURE 4. (a) **Pressure distribution in a conventional diamond anvil cell.** It is measured every  $3\ \mu\text{m}$  along a  $13\times 13$  points grid, using XRD signal of rhenium gasket with the equation of state from Ref. [1]. The maximum pressure is 279 GPa, and the anvils broke just after this measurement. The dashed circle indicates the limits of the central flat ( $28\ \mu\text{m}$  diameter). (b) **Strain of the anvils measured at several pressure steps in the same run.** The thickness of the rhenium gasket measured using monochromatic X-ray ( $\lambda=0.3738\ \text{\AA}$ ) absorption profiles. The red curve corresponds the data collected just before the anvils' breakdown.

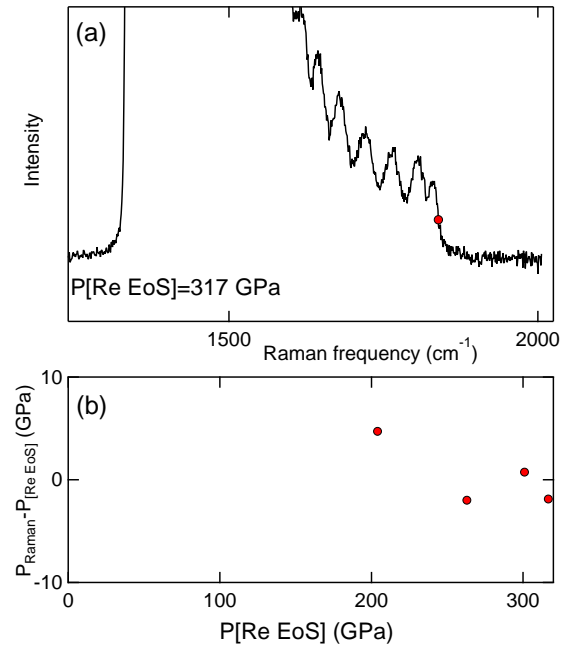

SUPPLEMENTARY FIGURE 5. (a) **Raman spectra collected at the center of the diamond anvil during run 3.** The high frequency edge (red point)  $\nu_C$  is used to measure the pressure. (b) **Difference between  $P_{\text{Raman}}$  and the pressure of rhenium gasket  $P_{\text{Re}}$  in runs 3 and 5.**  $P_{\text{Raman}}$  is calculated using the calibration valid above 200 GPa in Ref. [2].

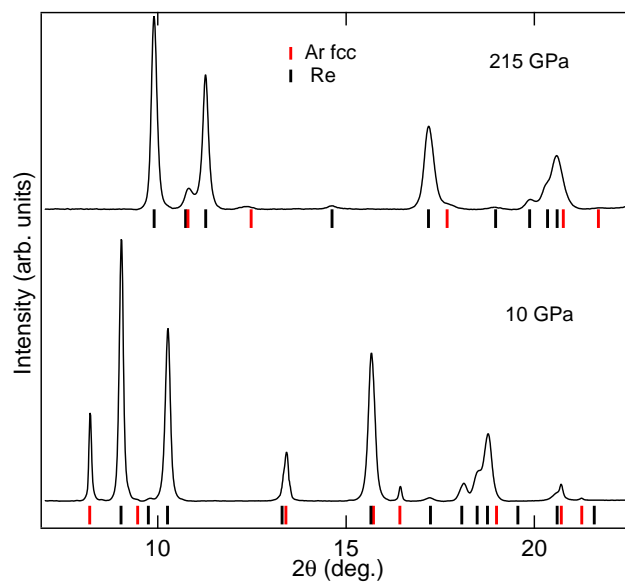

SUPPLEMENTARY FIGURE 6. XRD spectra collected at the center of the pressure chamber for run 5. All XRD peaks can be attributed to fcc argon or rhenium diffraction signal, as indicated by tick marks.

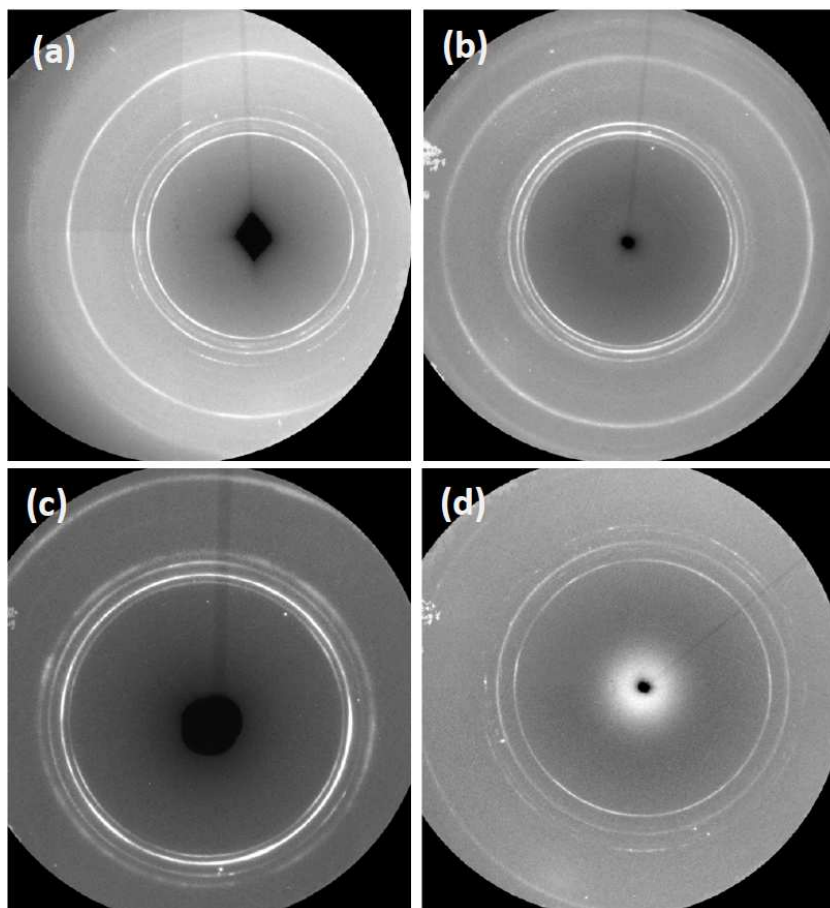

SUPPLEMENTARY FIGURE 7. X-ray diffraction spectra collected at the center of the toroidal-DAC. (a) run 1 (rhenium+gold signal), (b) run 2 (rhenium+gold signal), (c) run 3 (rhenium+aluminum+gold signal), (d) run 4 (rhenium+aluminum signal). The detector is a MAR-CCD, and the X-ray wavelength is 0.3738 Å. The exposure time varies between 20 and 40 s.

SUPPLEMENTARY TABLE 1. Raman high frequency edges  $\nu_C$  measured during runs 3 and 5, for various membrane pressures  $P_m$ .  $P_{\text{Raman}}$  are calculated using  $\nu_C$  and the calibrations from Ref. [2] (BP and HP are the calibrations valid below and above 200 GPa, respectively), and  $P_{\text{Re}}$  obtained from the rhenium XRD lines and the equation of state in Ref. [1]. For run 5, the anvil Raman signal has been measured in the laboratory four days after the XRD experiment and after a small membrane pressure decrease, so the pressure might have decreased by up to  $\sim 10$  GPa between XRD and Raman measurements.

| Run | $P_m$ (bars) | $\nu_C$ ( $\text{cm}^{-1}$ ) | $P_{\text{Raman}}$ (BP) (GPa) | $P_{\text{Raman}}$ (HP) (GPa) | $P_{\text{Re}}$ (GPa) |
|-----|--------------|------------------------------|-------------------------------|-------------------------------|-----------------------|
| 3   | 32           | 1701.5                       | 209                           | 205                           | 208                   |
| 3   | 37           | 1771.0                       | 261                           | 261                           | 261                   |
| 3   | 42           | 1821.8                       | 302                           | 311                           | 301                   |
| 3   | 44           | 1837.6                       | 315                           | 327                           | 317                   |
| 5   | 170          | 1918.0                       | 385                           | 425                           | 429                   |

SUPPLEMENTARY TABLE 2. **Equations of state (EoS) parameters obtained by a fit of  $P-V$  data for gold, aluminum and argon.** The  $P-V$  points plotted in figs. 3, 5 and 6 have been fitted with two equations of state formulations: Rydberg-Vinet (RV) [3] and Holzapfel "H02" [4]. The resulting parameters are listed here, compared with selected literature parameters. The parameters printed in bold have been fixed during the fit. The error bars indicate 95% confidence level of the fit. RV: Rydberg-Vinet [3]; H02: Holzapfel H02 EoS [4]; for argon, these equations of state are evaluated at 0 K (see above). The parameters obtained in this study compare very well with the parameters measured under quasi-hydrostatic compression at lower pressure (Refs. 5–8).

| Phase      | $V_0$ ( $\text{\AA}^3/\text{at}$ ) | $K_0$ (GPa) | $K'_0$           | EoS formulation   | study                    |
|------------|------------------------------------|-------------|------------------|-------------------|--------------------------|
| Au         | <b>16.962</b>                      | <b>167</b>  | $5.94 \pm 0.014$ | RV                | this study (0-603 GPa)   |
| Au         | <b>16.962</b>                      | <b>167</b>  | $5.74 \pm 0.011$ | H02               | this study (0-603 GPa)   |
| Au         | <b>16.962</b>                      | <b>167</b>  | 5.9              | RV                | Ref. 5 (0-131 GPa)       |
| fcc+hcp-Al | $16.103 \pm 0.2$                   | <b>73</b>   | $4.72 \pm 0.18$  | RV                | this study (0-368 GPa)   |
| fcc+hcp-Al | $16.207 \pm 0.2$                   | <b>73</b>   | $4.41 \pm 0.15$  | H02               | this study (0-368 GPa)   |
| fcc-Al     | <b>16.573</b>                      | <b>73</b>   | $4.54 \pm 0.02$  | RV                | Ref. 6 (0-165 GPa)       |
| fcc-Ar     | <b>37.45</b>                       | <b>2.65</b> | $7.562 \pm 0.02$ | RV (0 K) + Debye  | this study (0-248 GPa)   |
| fcc-Ar     | <b>37.45</b>                       | <b>2.65</b> | $7.119 \pm 0.02$ | H02 (0 K) + Debye | this study (0-248 GPa)   |
| fcc-Ar     | <b>37.45</b>                       | <b>2.65</b> | $7.587 \pm 0.05$ | RV (0 K) + Debye  | Refs. 7 and 8 (0-86 GPa) |

SUPPLEMENTARY TABLE 3. **X-ray diffraction lines for aluminum at selected pressures (run 4)**  
 Measured reflections for aluminum in run 4 corresponding to XRD spectra plotted in Fig. 5.  $\Delta d = d_{\text{obs}} - d_{\text{calc}}$ ,  
 $d_{\text{obs}}$  and  $d_{\text{calc}}$  being the interreticular distances, respectively, measured by individual peak fitting and calculated  
 with lattice parameters listed in the table.

| Conditions                                                   | $hkl$ | $d_{\text{obs}}$ (Å) | $\Delta d/d_{\text{obs}}$ ( $\times 10^4$ ) |
|--------------------------------------------------------------|-------|----------------------|---------------------------------------------|
| fcc-Al, $a=3.2506$ Å<br>$P_{\text{Re}}=184$ GPa              | 111   | 1.877                | 1.7                                         |
|                                                              | 200   | 1.625                | -1.7                                        |
| fcc-Al, $a=3.1827$ Å<br>$P_{\text{Re}}=231$ GPa              | 111   | 1.837                | -2.7                                        |
|                                                              | 200   | 1.592                | 2.7                                         |
| hcp-Al, $a=2.2504$ Å, $c=3.672$ Å                            | 100   | 1.949                | 0.5                                         |
|                                                              | 002   | 1.836                | 0.0                                         |
|                                                              | 101   | 1.721                | -2.9                                        |
|                                                              | 102   | 1.337                | 4.4                                         |
| hcp-Al, $a=2.200$ Å, $c=3.5674$ Å<br>$P_{\text{Re}}=301$ GPa | 002   | 1.784                | 1.7                                         |
|                                                              | 101   | 1.681                | 2.4                                         |
|                                                              | 102   | 1.301                | -8.4                                        |
| hcp-Al, $a=2.1625$ Å, $c=3.485$ Å<br>$P_{\text{Re}}=301$ GPa | 002   | 1.742                | -2.9                                        |
|                                                              | 101   | 1.649                | -2.4                                        |
|                                                              | 102   | 1.277                | 10.1                                        |
| bcc-Al                                                       | 110   | 1.704                | -                                           |



SUPPLEMENTARY TABLE 4. **Au EoS data.** Lattice parameters measured in runs 1 and 2.  $P_m$  (in bars) is the membrane pressure. The rhenium lattice parameters have been determined by a fit of XRD peaks positions with  $c/a$  ratio fixed to the average value obtained by a least-square refinement of all data ( $c/a=1.604$  and  $1.609$  in runs 1 and 2). For fcc Au, (111) and (200) diffraction peaks have been measured.  $P_{Re}$  (in GPa) is the pressure measured using Re lattice parameters and EoS [1]. The data are listed in the order they have been taken. Atomic volumes are  $V = a_{111 Au}^3/4$  for Au and  $V = \sqrt{3} \times a_{Re}^2 \times c_{Re}/4$  for Re.

| Run | $P_m$ | $a_{Re}$ (Å) | $c_{Re}$ (Å) | $P_{Re}$ | $a_{111 Au}$ (Å) | $a_{200 Au}$ (Å) | Run | $P_m$ | $a_{Re}$ (Å) | $c_{Re}$ (Å) | $P_{Re}$ | $a_{111 Au}$ (Å) | $a_{200 Au}$ (Å) |
|-----|-------|--------------|--------------|----------|------------------|------------------|-----|-------|--------------|--------------|----------|------------------|------------------|
| 1   | 15    | 2.7427       | 4.3993       | 10.0     | 4.0093           | 4.0099           | 2   | 33    | 2.7423       | 4.4124       | 9.30     | 4.0398           | 4.0378           |
|     | 25    | 2.7313       | 4.3810       | 16.0     | 3.9775           | 3.9766           |     | 36    | 2.7404       | 4.4094       | 10.2     | 4.0261           | 4.0256           |
|     | 35    | 2.7131       | 4.3518       | 24.0     | 3.9269           | 3.9261           |     | 39    | 2.7352       | 4.4010       | 12.5     | 4.0097           | 4.0098           |
|     | 45    | 2.6890       | 4.3131       | 37.0     | 3.8650           | 3.8780           |     | 41    | 2.7293       | 4.3915       | 15.2     | 3.9891           | 3.9921           |
|     | 50    | 2.4852       | 3.9863       | 232      | 3.5314           | 3.5249           |     | 43    | 2.7276       | 4.3888       | 15.9     | 3.9825           | 3.9884           |
|     | 51    | 2.4773       | 3.9735       | 243      | 3.5251           | 3.5236           |     | 45    | 2.7248       | 4.3842       | 17.3     | 3.9716           | 3.9800           |
|     | 53    | 2.4595       | 3.9450       | 271      | 3.5001           | 3.4993           |     | 47    | 2.7209       | 4.3779       | 19.1     | 3.9603           | 3.9709           |
|     | 53    | 2.4541       | 3.9363       | 280      | 3.4920           | 3.4875           |     | 49    | 2.7176       | 4.3725       | 20.8     | 3.9506           | 3.9613           |
|     | 55    | 2.4503       | 3.9303       | 286      | 3.4868           | 3.4817           |     | 51    | 2.7131       | 4.3654       | 22.9     | 3.9389           | 3.9509           |
|     | 57    | 2.4338       | 3.9039       | 315      | 3.4663           | 3.4615           |     | 53    | 2.7108       | 4.3616       | 24.1     | 3.9270           | 3.9398           |
|     | 57    | 2.4346       | 3.9052       | 314      | 3.4651           | 3.4619           |     | 55    | 2.7022       | 4.3478       | 28.6     | 3.9086           | 3.9212           |
|     | 60    | 2.4222       | 3.8852       | 337      | 3.4479           | 3.4468           |     | 57    | 2.6727       | 4.3005       | 45.3     | 3.8339           | 3.8476           |
|     | 63    | 2.4110       | 3.8673       | 358      | 3.4320           | 3.4308           |     | 57    | 2.6495       | 4.2630       | 60.4     | 3.7805           | 3.7994           |
|     | 66    | 2.4025       | 3.8536       | 376      | 3.4218           | 3.4217           |     | 57    | 2.6457       | 4.2569       | 63.0     | 3.7745           | 3.7954           |
|     | 69    | 2.3946       | 3.8410       | 392      | 3.4112           | 3.4108           |     | 58    | 2.6346       | 4.2391       | 70.9     | 3.7545           | 3.7776           |
|     | 72    | 2.3883       | 3.8308       | 406      | 3.4021           | 3.4012           |     | 59    | 2.5834       | 4.1567       | 113      | 3.6698           | 3.6954           |
|     | 75    | 2.3874       | 3.8294       | 408      | 3.4002           | 3.4032           |     | 60    | 2.4981       | 4.0194       | 210      | 3.5511           | 3.5706           |
|     | 78    | 2.3785       | 3.8152       | 428      | 3.3900           | 3.3890           |     | 61    | 2.4976       | 4.0187       | 211      | 3.5520           | 3.5785           |
|     | 82    | 2.3733       | 3.8067       | 440      | 3.3830           | 3.3869           |     | 62    | 2.4975       | 4.0185       | 211      | 3.5520           | 3.5770           |
|     | 86    | 2.3678       | 3.7979       | 453      | 3.3765           | 3.3817           |     | 63    | 2.4927       | 4.0107       | 217      | 3.5450           | 3.5685           |
|     | 90    | 2.3651       | 3.7935       | 459      | 3.3693           | 3.3744           |     | 64    | 2.4836       | 3.9961       | 230      | 3.5349           | 3.5600           |
|     | 94    | 2.3585       | 3.7830       | 475      | 3.3623           | 3.3698           |     | 65    | 2.4671       | 3.9696       | 255      | 3.5148           | 3.5423           |
|     | 98    | 2.3547       | 3.7769       | 485      | 3.3569           | 3.3634           |     | 66    | 2.4509       | 3.9435       | 281      | 3.4947           | 3.5242           |
|     | 103   | 2.3517       | 3.7721       | 493      | 3.3527           | 3.3544           |     | 67    | 2.4419       | 3.9291       | 296      | 3.4827           | 3.5131           |
|     | 108   | 2.3485       | 3.7669       | 501      | 3.3487           | 3.3566           |     | 67    | 2.4430       | 3.9307       | 294      | 3.4823           | 3.5163           |
|     | 113   | 2.3450       | 3.7613       | 510      | 3.3443           | 3.3469           |     | 72    | 2.4229       | 3.8984       | 331      | 3.4555           | 3.4919           |
|     | 118   | 2.3424       | 3.7573       | 517      | 3.3396           | 3.3476           |     | 75    | 2.4138       | 3.8838       | 348      | 3.4439           | 3.4894           |
|     | 123   | 2.3382       | 3.7504       | 528      | 3.3349           | 3.3367           |     | 80    | 2.4015       | 3.8640       | 373      | 3.4270           | 3.4784           |
|     | 129   | 2.3333       | 3.7426       | 541      | 3.3298           | 3.3245           |     | 85    | 2.3923       | 3.8492       | 392      | 3.4155           | 3.4710           |
|     | 135   | 2.3319       | 3.7404       | 545      | 3.3261           | 3.3248           |     | 90    | 2.3842       | 3.8362       | 409      | 3.4042           | 3.4574           |
|     | 141   | 2.3281       | 3.7343       | 556      | 3.3225           | 3.3198           |     | 100   | 2.3693       | 3.8122       | 443      | 3.3849           | 3.4422           |
|     | 147   | 2.3254       | 3.7299       | 563      | 3.3190           | 3.3180           |     |       |              |              |          |                  |                  |
|     | 154   | 2.3221       | 3.7246       | 573      | 3.3146           | 3.3127           |     |       |              |              |          |                  |                  |
|     | 161   | 2.3189       | 3.7196       | 582      | 3.3116           | 3.3120           |     |       |              |              |          |                  |                  |
|     | 170   | 2.3154       | 3.7138       | 593      | 3.3068           | 3.3034           |     |       |              |              |          |                  |                  |
|     | 180   | 2.3117       | 3.7080       | 603      | 3.3019           | 3.3005           |     |       |              |              |          |                  |                  |

SUPPLEMENTARY TABLE 5. **Au EoS data.** Lattice parameters measured in run 3.  $P_m$  (in bars) is the membrane pressure.  $a_{\text{Re}}$  and  $c_{\text{Re}}$  have been determined using a fixed  $c/a$  ratio (1.613 below 250 GPa, 1.606 above).  $a_{111}$  is the cubic lattice parameter measured using the (111) diffraction peak.  $P_{\text{Re}}$  (in GPa) is the pressure measured using Re lattice parameters and EoS [1]. The data are listed in the order they have been taken. Atomic volumes are  $V = a_{111}^3/4$  for fcc lattices and  $V = \sqrt{3} \times a^2 \times c/4$  for hcp lattices.

| Run | $P_m$  | $a_{\text{Re}} (\text{\AA})$ | $c_{\text{Re}} (\text{\AA})$ | $P_{\text{Re}}$ | $a_{111 \text{ Au}} (\text{\AA})$ | $a_{111 \text{ Al fcc}} (\text{\AA})$ | $a_{\text{Al hcp}} (\text{\AA})$ | $c_{\text{Al hcp}} (\text{\AA})$ |
|-----|--------|------------------------------|------------------------------|-----------------|-----------------------------------|---------------------------------------|----------------------------------|----------------------------------|
| 3   | 15     | 2.7477                       | 4.4320                       | 6.1             | 4.0531                            | 3.9893                                |                                  |                                  |
|     | 20     | 2.7369                       | 4.4147                       | 10.7            | 4.0059                            | 3.9045                                |                                  |                                  |
|     | 24     | 2.7257                       | 4.3966                       | 15.8            | 3.9755                            | 3.8345                                |                                  |                                  |
|     | 28     | 2.7167                       | 4.3820                       | 20.1            | 3.9513                            | 3.7840                                |                                  |                                  |
|     | 32     | 2.5313                       | 4.0830                       | 165             | 3.6100                            | 3.3006                                |                                  |                                  |
|     | 32     | 2.5024                       | 4.0267                       | 204             | 3.5657                            | 3.2444                                |                                  |                                  |
|     | 34     | 2.4951                       | 4.0246                       | 211             | 3.5592                            | 3.232                                 |                                  |                                  |
|     | 35     | 2.4891                       | 4.0149                       | 219             | 3.5503                            | 3.219                                 |                                  |                                  |
|     | 36     | 2.4785                       | 3.9980                       | 235             | 3.5329                            | 3.200                                 | 2.265                            | 3.671                            |
|     | 37     | 2.4640                       | 3.9550                       | 263             | 3.5100                            |                                       | 2.246                            | 3.621                            |
|     | 38     | 2.4590                       | 3.9484                       | 270             | 3.5041                            |                                       | 2.240                            | 3.613                            |
|     | 39     | 2.4560                       | 3.9435                       | 275             | 3.4943                            |                                       | 2.234                            | 3.605                            |
|     | 40     | 2.4490                       | 3.9322                       | 287             | 3.4881                            |                                       | 2.227                            | 3.594                            |
|     | 41     | 2.4450                       | 3.9260                       | 294             | 3.4824                            |                                       | 2.224                            | 3.584                            |
|     | 42     | 2.4410                       | 3.9190                       | 301             | 3.4772                            |                                       | 2.221                            | 3.576                            |
|     | 43     | 2.4360                       | 3.9120                       | 309             | 3.4730                            |                                       | 2.214                            | 3.565                            |
| 44  | 2.4320 | 3.9054                       | 317                          | 3.4631          |                                   | 2.209                                 | 3.558                            |                                  |

SUPPLEMENTARY TABLE 6. **Al EoS data.** Lattice parameters measured in run 4.  $P_m$  (in bars) is the membrane pressure.  $a_{Re}$  and  $c_{Re}$  have been determined using a fixed  $c/a$  ratio (1.61 below 250 GPa, 1.602 above).  $a_{111}$  is the cubic lattice parameter measured using the (111) diffraction peak.  $P_{Re}$  (in GPa) is the pressure measured using Re lattice parameters and EoS [1]. The data are listed in the order they have been taken. Atomic volumes are  $V = a_{111}^3/4$  for fcc lattices,  $V = \sqrt{3} \times a^2 \times c/4$  for hcp lattices and  $V = a^3/2$  for the bcc lattice.

| Run  | $P_m$ | $a_{Re}$ (Å) | $c_{Re}$ (Å) | $P_{Re}$ | $a_{111}$ Al fcc (Å) | $a_{Al}$ hcp (Å) | $c_{Al}$ hcp (Å) | $a_{bcc}$ Al (Å) |
|------|-------|--------------|--------------|----------|----------------------|------------------|------------------|------------------|
| 4    | 28    | 2.748        | 4.432        | 6.12     | 4.011                |                  |                  |                  |
|      | 32    | 2.743        | 4.424        | 8.10     | 3.988                |                  |                  |                  |
|      | 33    | 2.743        | 4.424        | 8.28     | 3.977                |                  |                  |                  |
|      | 35    | 2.742        | 4.423        | 8.51     | 3.954                |                  |                  |                  |
|      | 37    | 2.741        | 4.421        | 8.97     | 3.933                |                  |                  |                  |
|      | 38    | 2.734        | 4.410        | 12.0     | 3.912                |                  |                  |                  |
|      | 40    | 2.730        | 4.403        | 13.9     | 3.894                |                  |                  |                  |
|      | 42    | 2.724        | 4.394        | 16.6     | 3.869                |                  |                  |                  |
|      | 44    | 2.723        | 4.392        | 17.1     | 3.850                |                  |                  |                  |
|      | 46    | 2.720        | 4.390        | 18.2     | 3.828                |                  |                  |                  |
|      | 48    | 2.716        | 4.382        | 20.3     | 3.803                |                  |                  |                  |
|      | 50    | 2.710        | 4.372        | 23.3     | 3.780                |                  |                  |                  |
|      | 52    | 2.707        | 4.367        | 24.8     | 3.769                |                  |                  |                  |
|      | 54    | 2.710        | 4.361        | 24.5     | 3.752                |                  |                  |                  |
|      | 56    | 2.696        | 4.341        | 31.5     | 3.690                |                  |                  |                  |
|      | 57    | 2.660        | 4.284        | 52.8     | 3.582                |                  |                  |                  |
| 57.5 | 2.659 | 4.281        | 53.7         | 53.7     | 3.572                |                  |                  |                  |
|      | 58    | 2.651        | 4.289        | 56.1     | 3.550                |                  |                  |                  |
|      | 58    | 2.636        | 4.244        | 69.5     | 3.513                |                  |                  |                  |
| 58.5 | 2.619 | 4.217        | 82.3         | 82.3     | 3.459                |                  |                  |                  |
|      | 59    | 2.609        | 4.201        | 90.3     | 3.430                |                  |                  |                  |
|      | 59    | 2.595        | 4.180        | 102      | 3.393                |                  |                  |                  |
| 59.5 | 2.585 | 4.163        | 111          | 111      | 3.379                |                  |                  |                  |
|      | 61    | 2.556        | 4.116        | 140      | 3.312                |                  |                  |                  |
|      | 62    | 2.537        | 4.085        | 161      | 3.275                |                  |                  |                  |
|      | 63    | 2.516        | 4.059        | 184      | 3.252                |                  |                  |                  |
|      | 64    | 2.505        | 4.040        | 198      | 3.235                | 2.285            | 3.682            |                  |
|      | 65    | 2.496        | 4.027        | 210      | 3.221                | 2.277            | 3.670            |                  |
|      | 65    | 2.489        | 4.014        | 220      | 3.204                | 2.266            | 3.667            |                  |
|      | 66    | 2.487        | 4.011        | 223      | 3.198                | 2.264            | 3.664            |                  |
|      | 67    | 2.485        | 4.008        | 225      | 3.192                | 2.259            | 3.656            |                  |
|      | 68    | 2.481        | 4.001        | 231      | 3.181                | 2.252            | 3.644            |                  |
|      | 69    | 2.481        | 3.973        | 240      | 3.170                | 2.246            | 3.642            |                  |
|      | 70    | 2.475        | 3.964        | 249      | 3.162                | 2.241            | 3.634            |                  |
|      | 72    | 2.468        | 3.953        | 259      |                      | 2.230            | 3.617            |                  |
|      | 74    | 2.459        | 3.938        | 274      |                      | 2.220            | 3.609            |                  |
|      | 76    | 2.454        | 3.929        | 283      |                      | 2.212            | 3.596            |                  |
|      | 78    | 2.448        | 3.920        | 293      |                      | 2.205            | 3.583            |                  |
|      | 80    | 2.443        | 3.912        | 301      |                      | 2.200            | 3.568            |                  |
|      | 83    | 2.437        | 3.903        | 312      |                      | 2.193            | 3.556            |                  |
|      | 83    | 2.433        | 3.897        | 319      |                      | 2.188            | 3.549            |                  |
|      | 86    | 2.430        | 3.892        | 324      |                      | 2.186            | 3.545            |                  |
|      | 89    | 2.426        | 3.886        | 332      |                      | 2.180            | 3.535            |                  |
|      | 92    | 2.424        | 3.881        | 336      |                      | 2.174            | 3.527            |                  |
|      | 95    | 2.417        | 3.871        | 349      |                      | 2.168            | 3.516            | 2.423            |
|      | 98    | 2.414        | 3.866        | 355      |                      | 2.164            | 3.510            | 2.417            |
| 100  | 2.410 | 3.859        | 363          |          |                      | 2.161            | 3.503            | 2.413            |
| 103  | 2.407 | 3.856        | 368          |          |                      | 2.159            | 3.494            | 2.411            |

SUPPLEMENTARY TABLE 7. **Ar EoS data.** Lattice parameters measured in run 5.  $P_m$  is the membrane pressure.  $a_{\text{Re}}$  and  $c_{\text{Re}}$  have been determined using a fixed  $c/a$  ratio (1.613 below 250 GPa, 1.606 above).  $a_{111, \text{Ar}}$  is the cubic lattice parameter of argon measured using the (111) diffraction peak.  $P_{\text{Re}}$  is the pressure measured using Re lattice parameters and EoS [1]. The data are listed in the order they have been taken. Atomic volumes are  $V = a_{111, \text{Ar}}^3/4$  for argon and  $V = \sqrt{3} \times a_{\text{Re}}^2 \times c_{\text{Re}}/4$  for Re.

| Run | $P_m$ (bars) | $a_{\text{Re}}$ (Å) | $c_{\text{Re}}$ (Å) | $P_{\text{Re}}$ (GPa) | $a_{111, \text{Ar}}$ (Å) |
|-----|--------------|---------------------|---------------------|-----------------------|--------------------------|
| 5   | 42           | 2.744               | 4.398               | 10.3                  | 4.531                    |
|     | 47           | 2.739               | 4.393               | 12.0                  | 4.489                    |
|     | 52           | 2.735               | 4.386               | 14.0                  | 4.389                    |
|     | 57           | 2.730               | 4.377               | 16.5                  | 4.296                    |
|     | 62           | 2.723               | 4.376               | 18.6                  | 4.224                    |
|     | 67           | 2.656               | 4.259               | 58.1                  | 3.857                    |
|     | 67           | 2.612               | 4.180               | 92.2                  | 3.712                    |
|     | 70           | 2.566               | 4.115               | 133                   | 3.600                    |
|     | 72           | 2.535               | 4.065               | 167                   | 3.520                    |
|     | 74           | 2.519               | 4.021               | 191                   | 3.479                    |
|     | 76           | 2.501               | 3.993               | 215                   | 3.439                    |
|     | 78           | 2.495               | 3.983               | 223                   | 3.421                    |
|     | 80           | 2.478               | 3.957               | 248                   | 3.384                    |
|     | 83           | 2.473               | 3.948               | 255                   |                          |
|     | 86           | 2.464               | 3.933               | 270                   |                          |
|     | 89           | 2.459               | 3.925               | 279                   |                          |
|     | 94           | 2.449               | 3.909               | 296                   |                          |
|     | 99           | 2.438               | 3.900               | 312                   |                          |
|     | 104          | 2.430               | 3.889               | 325                   |                          |
|     | 109          | 2.423               | 3.885               | 336                   |                          |
|     | 115          | 2.416               | 3.874               | 349                   |                          |
|     | 123          | 2.408               | 3.856               | 367                   |                          |
|     | 131          | 2.402               | 3.851               | 377                   |                          |
|     | 140          | 2.396               | 3.841               | 391                   |                          |
|     | 150          | 2.389               | 3.83                | 405                   |                          |
|     | 160          | 2.384               | 3.822               | 416                   |                          |
|     | 170          | 2.378               | 3.813               | 429                   |                          |

**SUPPLEMENTARY NOTE 1: RAMAN SIGNAL OF THE DIAMOND ANVILS (RUNS 3 AND 5)**

The pressure based on diamond anvil fluorescence signal measured at several pressure steps in run 3. The Raman signal of the diamond anvil in contact with the sample has been excited with a 30 mW laser with 647 nm wavelength, collected by a  $\times 50$  microscope objective and dispersed with a Shamrock 1200 grating spectrometer, equipped with an Andor iDus 401 camera; one spectrum is presented in Supplementary Figure 5a. The calibration is from Ref. [2] (calibration valid below 200 GPa). The pressure is compared with the pressure measured with rhenium EoS [1] in Supplementary Figure 5b. We find that the calibration expected to be valid above 200 GPa in Ref. [2] slightly overestimates pressure (by up to 12 GPa) in run 3 but agrees with rhenium pressure in run 5 (within error bars, see Supplementary Table 1). The current measurements thus suggest that rhenium [1] and Raman HP [2] pressure gauges agree within 12 GPa up to 430 GPa.

**SUPPLEMENTARY NOTE 2: EVALUATION OF NON-HYDROSTATIC STRESS (RUNS 1 AND 2)**

We provide below the details of the analysis carried out to estimate  $\sigma_3 - \sigma_1$ , where  $\sigma_3$  and  $\sigma_1$  are the stress components in the axial (vertical) and radial directions in the sample, respectively.

**Analysis of the positions of gold X-ray diffraction lines**

The non-hydrostatic stress is evaluated using the method developed by Singh [9] and commonly used in the high pressure literature [5, 10]. For cubic crystals, it is based on the comparison between the lattice parameters calculated from the diffraction angle for different diffraction lines. If the crystal remains cubic, all diffraction lines yield identical lattice parameters. If it is strained, they differ by a factor proportional to  $\sigma_3 - \sigma_1$  and to the elastic anisotropy of the crystal  $S$ :

$$S = (1/C' - 1/C)/2, \quad (1)$$

where  $C = C_{44}$  and  $C' = (C_{11} - C_{12})/2$  are the two shear constants of the cubic crystal.  $S$  was estimated following the same method as in Ref. 5 based on low compression measurements of the elastic moduli of gold [11].

In runs 1 and 2, we could follow two gold diffraction lines: (111) and (200). For these lines, Singh's analysis reduces to (with an error of less than 4 %):

$$\sigma_3 - \sigma_1 = \frac{3(a_{200} - a_{111})}{\alpha a_{111} S}, \quad (2)$$

where  $\alpha$  is a factor between 0.5 and 1. We plotted in Fig. 3 the results obtained for  $\alpha=1$ , which corresponds to an iso-stress assumption in the powder and provides minimum values for  $\sigma_3 - \sigma_1$ .

**Analysis of the X-ray diffraction lines width**

We followed the method proposed in Ref. [12]. The micro-stress  $\sigma$  is the difference in stress between the crystallites that constitute the powder. This stress difference is upper bounded by the yield strength of the material.  $\sigma$  is expressed as a function of X-ray diffraction peaks angle ( $2\theta$  is the diffraction angle) and Full Width at Half Maximum, FWHM, through:

$$(FWHM \cos \theta)^2 = (2\sigma)^2 \frac{\sin^2 \theta}{E_{\text{hkl}}^2} + (FWHM(\sigma = 0) \cos \theta)^2, \quad (3)$$

$E_{\text{hkl}}$  being the single crystal Young modulus along the direction  $hkl$  at the relevant pressure. For a cubic material [13]:

$$E_{\text{hkl}} = \left( \frac{C' + 3K}{9KC'} - \frac{C - C'}{CC'} \Gamma_{\text{hkl}} \right)^{-1}, \quad (4)$$

where  $K$  is the bulk modulus of the crystal,  $C$  and  $C'$  are the shear constants of the cubic crystal (defined above), calculated using literature data [5, 11], and  $\Gamma_{\text{hkl}}$  is defined by:

$$\Gamma_{\text{hkl}} = (h^2 k^2 + h^2 l^2 + k^2 l^2) / (h^2 + k^2 + l^2)^2. \quad (5)$$

The measurement of  $FWHM$  for two diffraction lines of gold, (111) and (200), allows to evaluate  $\sigma$  as plotted in Fig. 3.

**SUPPLEMENTARY NOTE 3: EQUATION OF STATE OF ARGON FROM LITERATURE DATA**

Following Finger et al. [7], the pressure in argon is expressed as a sum of a static pressure  $P_0(V)$  (expressed with a Rydberg-Vinet equation of state [3]) at 0 K and a thermal pressure  $P_{th}(V, T)$  estimated with the Mie-Grüneisen Debye formalism:  $P(V, T) = P_0(V) + P_{th}(V, T)$ .  $x = V/V_0$ ,  $V_0$  being the equilibrium volume of argon at ambient pressure and 0 K.

$$P_0(V) = 3K_0(1-x)x^{-2} \exp\left(\frac{3}{2}(K'_0 - 1)(1-x)\right), \quad (6)$$

and

$$P_{th}(V, T) = \frac{3\gamma RT}{V} \left[ D\left(\frac{\theta_D}{T}\right) \right]. \quad (7)$$

(the zero point pressure is neglected). In Eq. 6, the parameters  $K_0$  and  $K'_0$  are the bulk modulus and its pressure derivative at equilibrium volume and 0 K. In Eq. 7,  $D$  is the Debye function and the Grüneisen parameter  $\gamma$  is assumed to behave as [7]:

$$\gamma(V) = 2.20 \times x + 0.5 \quad (8)$$

and the Debye temperature as:

$$\theta_D(V) = 93.3\sqrt{(1/x)} \times \exp(2.20(1-x)). \quad (9)$$

We have fixed  $V_0$  and  $K_0$  to the values given in Refs. 14 and 15:  $V_0 = 37.45 \text{ \AA}^3/\text{at}$  and  $K_0 = 2.65 \text{ GPa}$ . The parameter  $K'_0$  has been obtained by a fit of the 298 K data reported in Refs. 7 and 8, with the ruby pressure modified according to the correction proposed in Ref. 16:  $K'_0 = 7.587$ .

## SUPPLEMENTARY REFERENCES

---

- [1] Anzellini, S., Dewaele, A., Occelli, F., Loubeyre, P. & Mezouar, M. Equation of state of rhenium and application for ultra high pressure calibration. *J. Appl. Phys.* **115**, 043511 (2014).
- [2] Akahama, Y. & Kawamura, H. Pressure calibration of diamond anvil Raman gauge to 410 GPa. In Takemura, K (ed.) *International conference on high pressure science and technology, joint AIRAPT-22 and HPCJ-50*, vol. 215 of *Journal of Physics Conference Series*, 012195 (2010). Joint AIRAPT-22 and HPCJ-50 Conference/International Conference on High Pressure Science and Technology, Tokyo, JAPAN, JUL 26-31, 2009.
- [3] Vinet, P., Rose, J. H., Ferrante, J., & Smith, J. R. Universal features of the equation of state of solids. *J. Phys. Condens. Matter* **1**, 1941–1963 (1989).
- [4] Holzapfel, W. Equations of State for regular solids. *High Press. Res.* **22**, 209–216 (2002). 39th European High Pressure Research Group Meeting on Advances on High Pressure Research (EHPRHG'39), SANTANDER, SPAIN, SEP 16-19, 2001.
- [5] Takemura, K. & Dewaele, A. Isothermal equation of state for gold with a He-pressure medium. *Phys. Rev. B* **78**, 104119–104131 (2008).
- [6] Dewaele, A., Loubeyre, P. & Mezouar, M. Equations of state of six metals above 94 GPa. *Phys. Rev. B* **70**, 094112–094119 (2004).
- [7] Finger, L., Hazen, R., Zou, G., Mao, H., H. & Bell, P. Structure and compression of crystalline argon and neon at high-pressure and room-temperature. *Appl. Phys. Lett.* **39**, 892–894 (1981).
- [8] Ross, M., Mao, H., Bell, P. & Xu, J. A. The equation of state of dense argon - a comparison of shock and static studies. *J. Chem. Phys.* **85**, 1028–1033 (1986).
- [9] Singh, A. & Kenichi, T. Measurement and analysis of nonhydrostatic lattice strain component in niobium to 145 GPa under various fluid pressure-transmitting media. *J. Appl. Phys.* **90**, 3269–3275 (2001).
- [10] Dewaele, A. & Loubeyre, P. Pressurizing conditions in helium-pressure-transmitting medium. *High Press. Res.* **27**, 419–429 (2007).
- [11] Hiki, Y. & Granato, A. V. Anharmonicity in noble metals; higher order elastic constants. *Phys. Rev.* **144**, 411–419 (1966).
- [12] Singh, A. K., Liermann, H. P. & Saxena, S. K. Strength of magnesium oxide under high pressure: Evidence for the grain-size dependence. *Sol. State Comm.* **132**, 795 (2004).
- [13] Nagao, S., Nordlund, K. & Nowak, R. Anisotropic elasticity of IVB transition-metal mononitrides determined by ab initio calculations. *Phys. Rev. B* **73**, 144113 (2006).
- [14] Peterson, O., Batchelder, D. & Simmons, R. Measurements of X-ray lattice constant thermal expansivity and isothermal compressibility of argon crystals. *Phys. Rev.* **150**, 703 (1966).
- [15] Jelinek, G. Properties of crystalline argon, krypton, and xenon based upon Born-Huang method of homogeneous deformations. III. The low-temperature limit. *Phys. Rev. B* **5**, 3210 (1972).
- [16] Dewaele, A., Torrent, M., Loubeyre, P. & Mezouar, M. Compression curves of transition metals in the Mbar range: Experiments and projector augmented-wave calculations. *Phys. Rev. B* **78**, 104102–104114 (2008).
